# Supplementary material
Source: PubMed Central journal article supplement (PMC4768634)
Supplement: cir-131-633-s001.pdf [file cir-131-633-s001.pdf]

## **SUPPLEMENTARY MATERIAL**

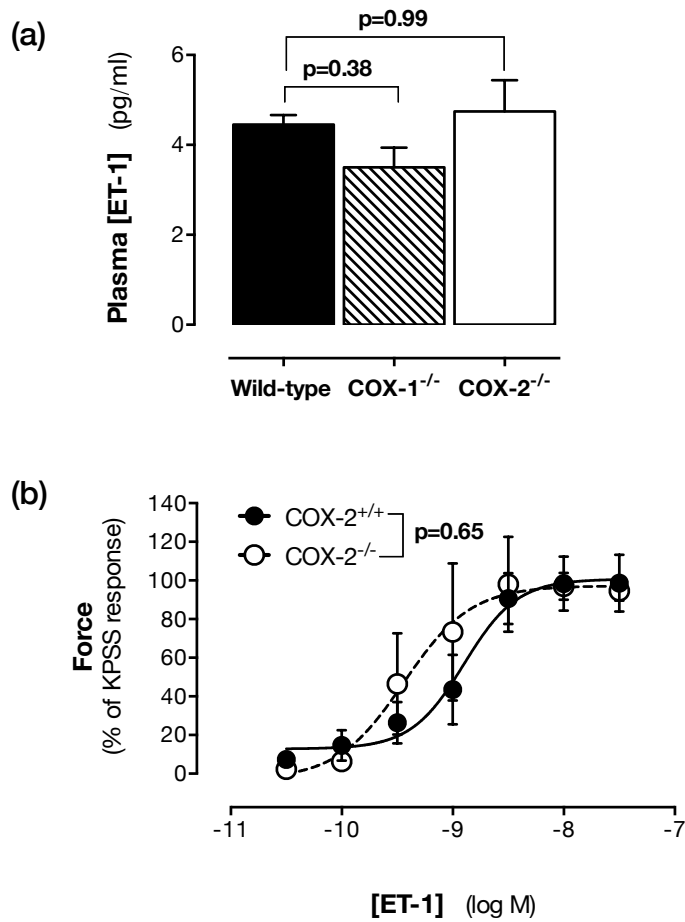

**Supplementary Fig. 1:** Effect of COX-1 and COX-2 gene deletion on (a) circulating endothelin-1 (ET-1) and (b) contractile effect of ET-1 on aorta. Aorta were incubated in Krebs' buffer containing 100  $\mu$ M L-N<sup>G</sup>monomethyl-L-arginine to inhibit eNOS activity. Data is the mean  $\pm$  S.E.M for (a) n=8-9 mice and (b) n=4 vessels from 2 mice. Data was analysed using (a) Kruskal-Wallis with Dunn's post-hoc test and (b) by Quades two-way ANOVA.

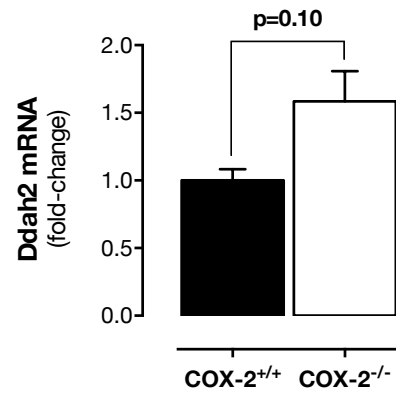

**Supplementary Fig 2:** Effect of COX-2 gene deletion on Ddah2 expression in the renal medulla. The data is the mean mean  $\pm$  S.E.M for n=7. Data was analysed using a Mann-Whitney U-test.

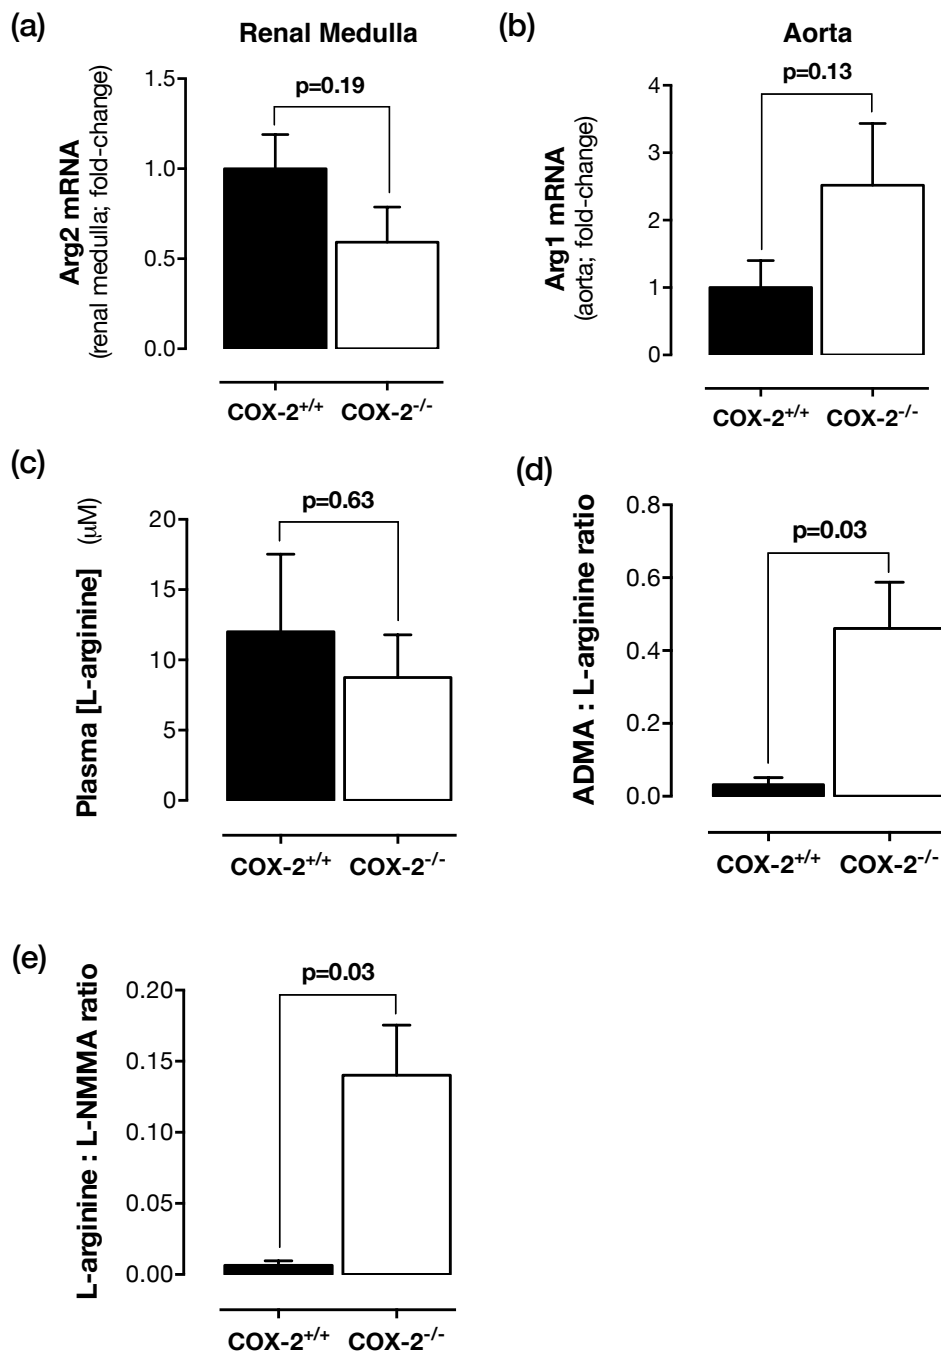

**Supplementary Fig. 3:** Effect of COX-2 gene deletion on the expression of (a) Arg2 in the renal medulla, (b) Arg1 in the aorta and plasma levels of (c) L-arginine, (d) ratio of ADMA: L-arginine and (e) L-NMMA:L-arginine in the plasma. The data is the mean  $\pm$  S.E.M for (a) and (b)  $n=7-8$ , (c-e)  $n=4$ . Data was analysed Mann-Whitney U-test.

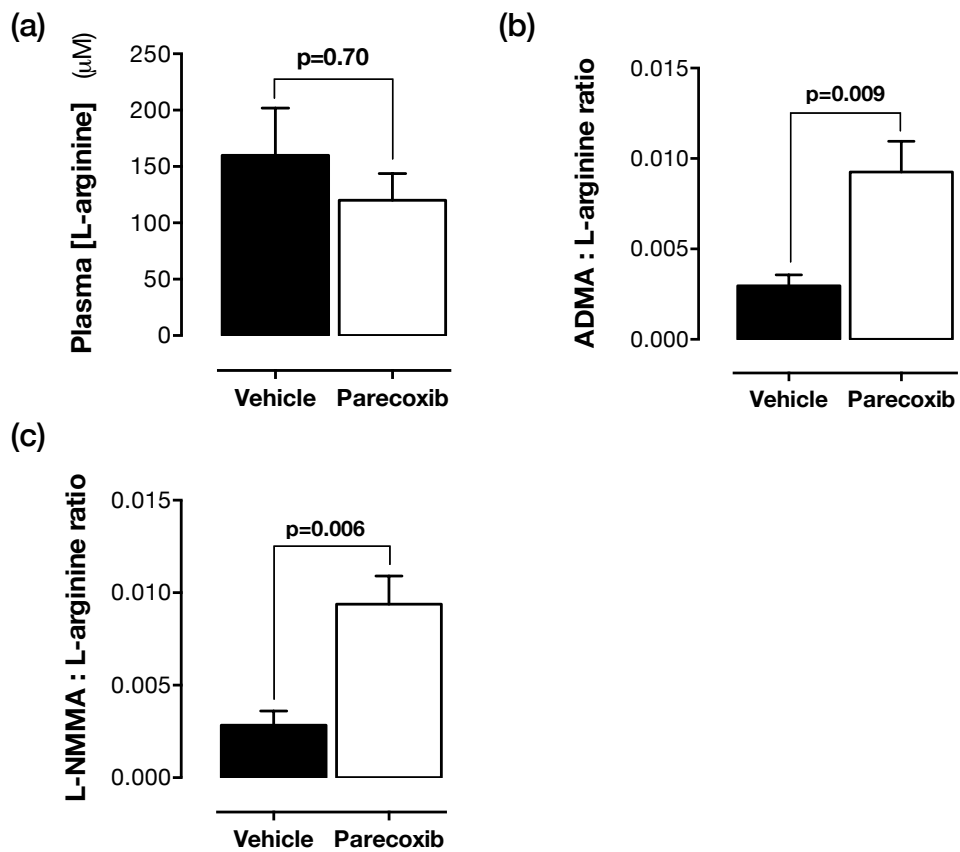

**Supplementary Fig. 4:** Effect of parecoxib (100 mg/kg/day) compared to vehicle (water) on plasma levels of (a) L-arginine and (b) ADMA:L-arginine and (c) L-NMMA:L-arginine ratios in plasma of wild type mice. The data is the mean  $\pm$  S.E.M n=3-7. Data was analysed using a Mann-Whitney U-test.

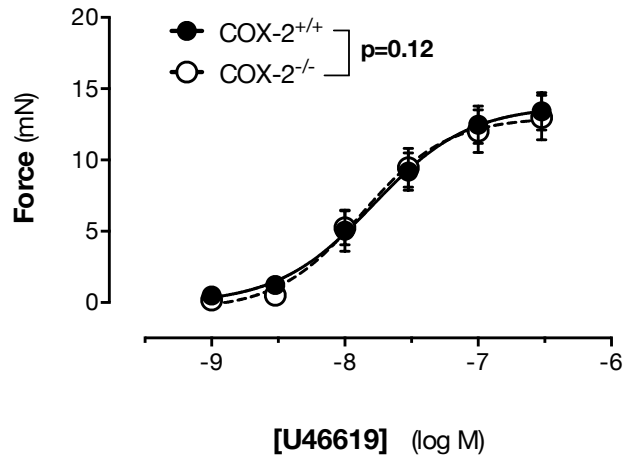

**Supplementary Fig. 5:** Effect of COX-2 gene deletion on the contractile responses of U46619 in aorta. The data the mean  $\pm$  S.E.M for n=6-10. Data was analysed using a Quades two-way ANOVA.

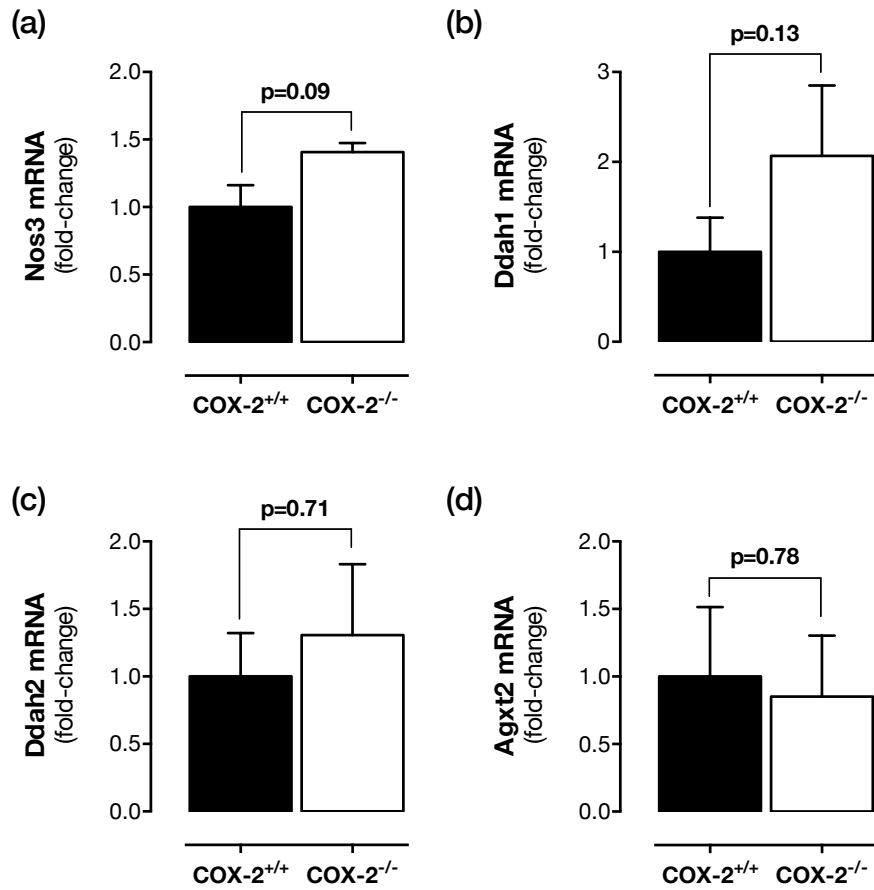

**Supplementary Fig. 6:** Effect of COX-2 gene deletion on aortic expression of (a) Nos3, (b) Ddah1, (c) Ddah2 and (d) Agxt2. The data is the mean  $\pm$  S.E.M for n=5-7 mice. Data was analysed using a Mann-Whitney U-test

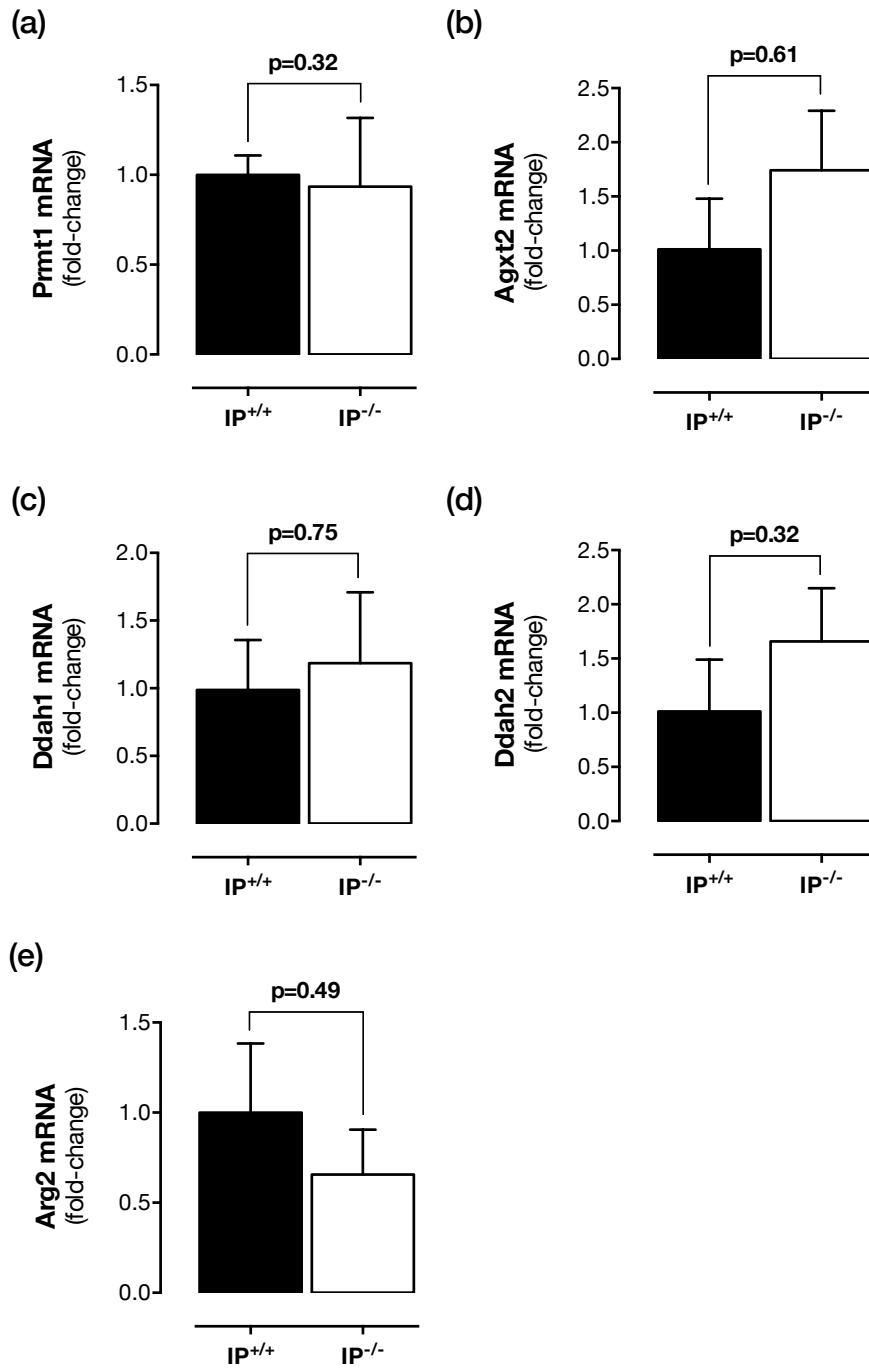

**Supplementary Fig. 7:** Effect of IP gene deletion on the expression of (a) Prmt1, (b) Agxt2, (c) Ddah1, (d) Ddah2 and (e) Arg2 in the renal medulla. The data is the mean  $\pm$  S.E.M n=8. Data was analysed using a Mann-Whitney U-test.



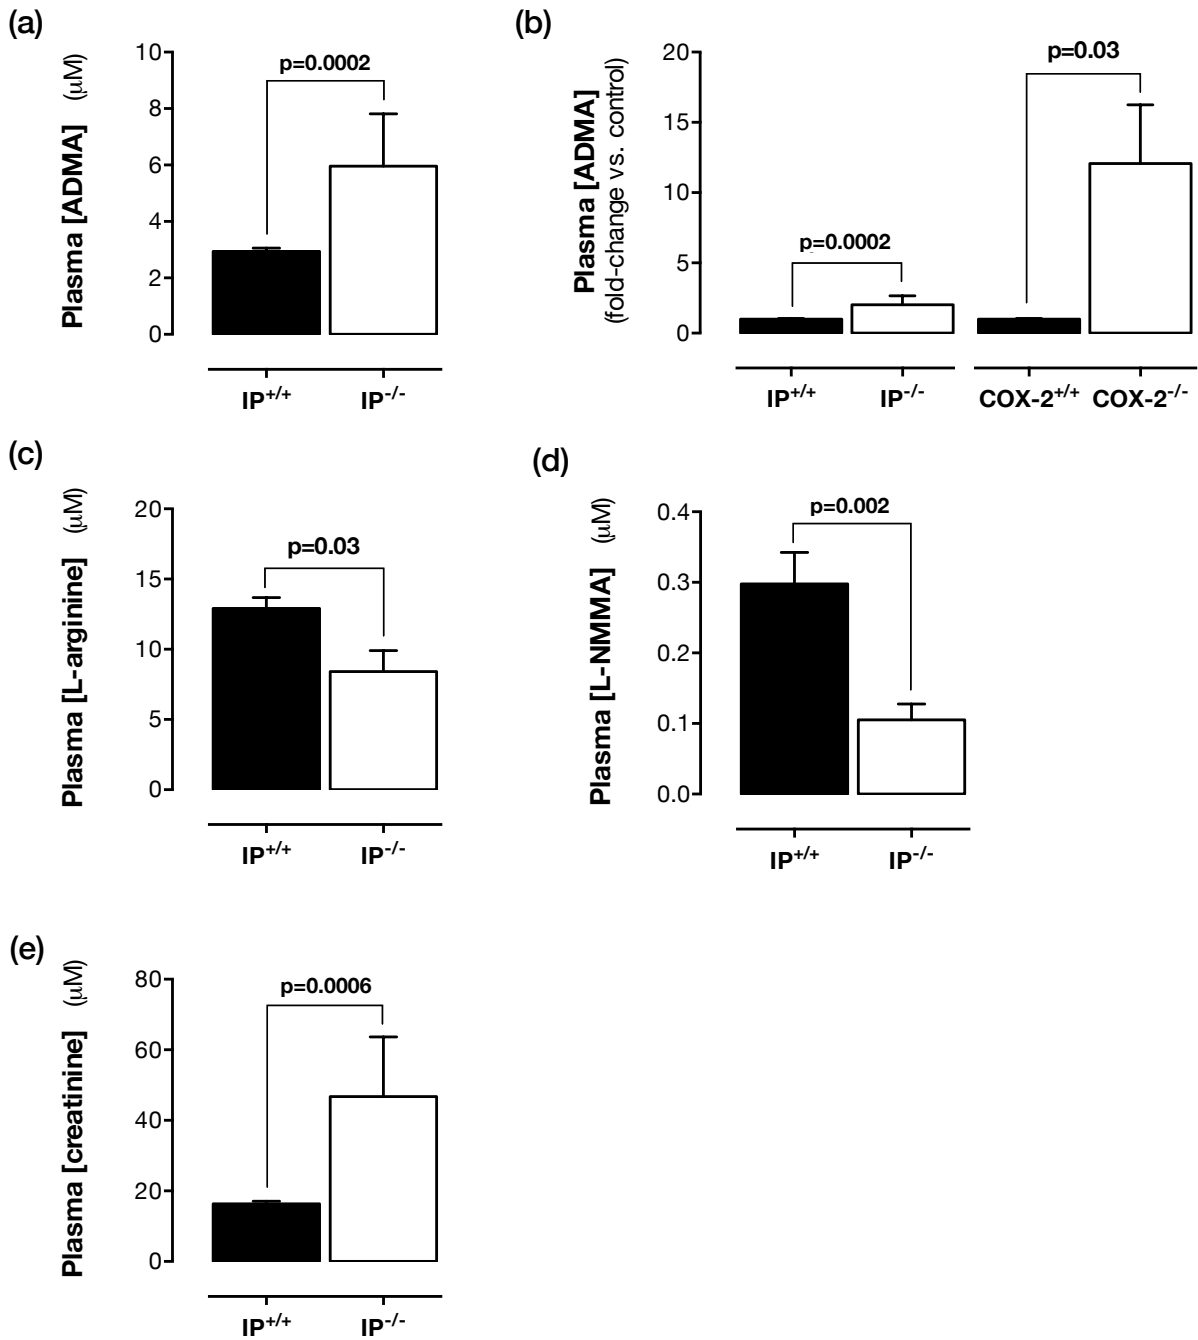

**Supplementary Fig. 8:** (a) Effect of IP gene deletion on plasma levels of ADMA. (b) Comparison of the effect of IP gene deletion versus COX-2 gene deletion on relative (fold) change in ADMA. (c) Effect of IP gene deletion on plasma levels of (c) L-arginine, (d) L-NMMA and (e) creatinine. The data is the mean  $\pm$  S.E.M for  $n=8$ . Data was analysed using Mann-Whitney U-test

| Gene Symbol   | Fold-Change | Gene Symbol   | Fold-Change | Gene Symbol   | Fold-Change |
|---------------|-------------|---------------|-------------|---------------|-------------|
| Igfbp2        | 3.2         | Nupr1         | 1.8         | Spon2         | 1.7         |
| Upk2          | 2.8         | Arhgef4       | 1.8         | Spnb3         | 1.7         |
| Psca          | 2.5         | Stab1         | 1.8         | Sppl3         | 1.7         |
| Nrip3         | 2.5         | Ccdc3         | 1.8         | Sepw1         | 1.7         |
| Neurl         | 2.4         | Lgals3        | 1.8         | Pea15         | 1.7         |
| Rgs4          | 2.4         | Gpr123        | 1.8         | Kdelr3        | 1.7         |
| Egr1          | 2.4         | Jun           | 1.8         | Susd4         | 1.7         |
| Lypd2         | 2.4         | Col6a1        | 1.8         | Ctsk          | 1.7         |
| Npy           | 2.3         | Spon1         | 1.8         | Ptprb         | 1.7         |
| Lyz           | 2.2         | Slc24a3       | 1.8         | Rasl11b       | 1.7         |
| Spnb1         | 2.2         | Ophn1         | 1.8         | Ssbp4         | 1.7         |
| Cacna2d1      | 2.1         | Gprc5a        | 1.8         | Samd14        | 1.7         |
| Nbl1          | 2.1         | Elf3          | 1.8         | Abi3          | 1.7         |
| Loc100047934  | 2.1         | F13a1         | 1.8         | Fst           | 1.7         |
| Aoc3          | 2.1         | Serpinf1      | 1.8         | Tnrc6c        | 1.7         |
| Fbn1          | 2.1         | Asah3l        | 1.8         | Itgb4         | 1.7         |
| Lynx1         | 2.1         | Cntn1         | 1.8         | Cfp           | 1.7         |
| Ndn           | 2.1         | Tmem118       | 1.8         | D12ertd553e   | 1.7         |
| Aatk          | 2.1         | Megf9         | 1.8         | S100a13       | 1.7         |
| Purb          | 2.0         | Ptprs         | 1.8         | Txnip         | 1.7         |
| Zeb2          | 2.0         | Scara3        | 1.8         | Mmp17         | 1.7         |
| Upk1b         | 2.0         | Serpina3n     | 1.8         | Anxa2         | 1.7         |
| Lcn2          | 2.0         | D0h4s114      | 1.8         | Bok           | 1.7         |
| Sprr1a        | 2.0         | Cyp1b1        | 1.8         | Serinc2       | 1.7         |
| Klf5          | 2.0         | Gja1          | 1.8         | Aqp2          | 1.7         |
| Satb1         | 2.0         | Rhoj          | 1.8         | Loc100045019  | 1.7         |
| Ankrd1        | 1.9         | Vwf           | 1.8         | Cdkn1c        | 1.7         |
| Bc025575      | 1.9         | Loc100046044  | 1.8         | Stat3         | 1.7         |
| Cldn5         | 1.9         | Loc100043671  | 1.8         | Axin2         | 1.7         |
| Lyzs          | 1.9         | Wnt7b         | 1.8         | Pof1b         | 1.7         |
| Chst1         | 1.9         | Slc44a2       | 1.8         | Laptm5        | 1.7         |
| Flrt3         | 1.9         | P2ry6         | 1.8         | F2r           | 1.7         |
| Loc100047200  | 1.9         | Bcl9l         | 1.8         | Endod1        | 1.7         |
| Krt18         | 1.9         | Klf6          | 1.8         | Atf5          | 1.7         |
| Fxyd6         | 1.9         | Fscn1         | 1.8         | C030011o14rik | 1.7         |
| Rab15         | 1.9         | Cldn4         | 1.8         | D16ertd472e   | 1.7         |
| Grit          | 1.9         | E430002d04rik | 1.8         | Hist1h2af     | 1.7         |
| Tmem119       | 1.9         | Dusp7         | 1.7         | Stxbp1        | 1.7         |
| Col16a1       | 1.9         | Upk3a         | 1.7         | Ckb           | 1.7         |
| Krt14         | 1.9         | Cygb          | 1.7         | 2310022b05rik | 1.7         |
| Nav1          | 1.9         | Il18r1        | 1.7         | Tmem110       | 1.7         |
| Loc100048721  | 1.9         | Hist1h2an     | 1.7         | Ap3m2         | 1.7         |
| Mmp14         | 1.9         | Gnaz          | 1.7         | Gjb6          | 1.7         |
| Scarf2        | 1.9         | Rgs5          | 1.7         | Ankrd47       | 1.7         |
| 9130213b05rik | 1.9         | Pip4k2a       | 1.7         | Col1a2        | 1.7         |
| Ccdc80        | 1.9         | Ppp1r9b       | 1.7         | Des           | 1.7         |
| Ddit4         | 1.8         | Zfp52         | 1.7         | H2-aa         | 1.7         |

| Gene Symbol   | Fold-Change | Gene Symbol   | Fold-Change | Gene Symbol   | Fold-Change |
|---------------|-------------|---------------|-------------|---------------|-------------|
| Gp38          | 1.7         | Fxyd4         | 1.6         | Myst4         | 1.6         |
| Ppp1r3c       | 1.7         | D6wsu176e     | 1.6         | Gata2         | 1.6         |
| Emid2         | 1.7         | Slc1a3        | 1.6         | Scx           | 1.6         |
| Crip2         | 1.6         | Kpnb1         | 1.6         | Sidt1         | 1.6         |
| Notch1        | 1.6         | Ahi1          | 1.6         | A230050p20rik | 1.6         |
| Ier3          | 1.6         | Edg2          | 1.6         | Npnt          | 1.6         |
| Fcho1         | 1.6         | 4930572j05rik | 1.6         | Traf7         | 1.6         |
| Slco4a1       | 1.6         | Cugbp2        | 1.6         | Spire2        | 1.6         |
| Lrrc26        | 1.6         | Loc100045343  | 1.6         | Esam1         | 1.6         |
| Nnmt          | 1.6         | Tcof1         | 1.6         | Magee1        | 1.6         |
| Tiam1         | 1.6         | Loc676420     | 1.6         | Pkm2          | 1.6         |
| Actb          | 1.6         | Phc2          | 1.6         | Xlr4a         | 1.6         |
| Prkcbp1       | 1.6         | Ccdc85b       | 1.6         | Loc100042777  | 1.6         |
| Dkk3          | 1.6         | Adora1        | 1.6         | Ppap2b        | 1.6         |
| Myo9b         | 1.6         | Grasp         | 1.6         | Tspan17       | 1.6         |
| Dusp26        | 1.6         | Pdlim1        | 1.6         | Itga3         | 1.6         |
| Slc2a6        | 1.6         | Gja5          | 1.6         | Serf2         | 1.6         |
| Pitpnm2       | 1.6         | Sh3pxd2b      | 1.6         | Csf1          | 1.6         |
| 2310010m24rik | 1.6         | Rcan2         | 1.6         | Sh3bgrl3      | 1.6         |
| Adamts2       | 1.6         | Sepn1         | 1.6         | Pip4k2b       | 1.6         |
| Pitx2         | 1.6         | Prep          | 1.6         | Psmb10        | 1.6         |
| Pfkl          | 1.6         | Dusp3         | 1.6         | Hn1           | 1.6         |
| Bace1         | 1.6         | Capn13        | 1.6         | Bc021381      | 1.5         |
| Csnk1e        | 1.6         | Mmp2          | 1.6         | Col18a1       | 1.5         |
| Ccnd2         | 1.6         | Irf2bp1       | 1.6         | Btg1          | 1.5         |
| Chrnbl        | 1.6         | Sema3f        | 1.6         | Notch4        | 1.5         |
| Gstm2         | 1.6         | Hcn2          | 1.6         | Ragefl1       | 1.5         |
| Efemp2        | 1.6         | Rgs10         | 1.6         | Fmn13         | 1.5         |
| Dag1          | 1.6         | 9130404d14rik | 1.6         | Cldn23        | 1.5         |
| Cav1          | 1.6         | Csrp1         | 1.6         | Upk1a         | 1.5         |
| Myd116        | 1.6         | Pik3r1        | 1.6         | Dusp8         | 1.5         |
| Pdgfra        | 1.6         | Pls3          | 1.6         | Phactr1       | 1.5         |
| Scnn1b        | 1.6         | Mbc2          | 1.6         | Mospd3        | 1.5         |
| Slc38a2       | 1.6         | Dab2ip        | 1.6         | Foxj2         | 1.5         |
| Rbms3         | 1.6         | Meis1         | 1.6         | Smarcd2       | 1.5         |
| Zfp46         | 1.6         | Axl           | 1.6         | Arrdc2        | 1.5         |
| Pdlim7        | 1.6         | Edn1          | 1.6         | Rem1          | 1.5         |
| Cxcl4         | 1.6         | Mef2c         | 1.6         | Slc9a1        | 1.5         |
| Kctd10        | 1.6         | Pold1         | 1.6         | Pdpx          | 1.5         |
| Wfdc2         | 1.6         | Ehd4          | 1.6         | Pacs1         | 1.5         |
| St6gal1       | 1.6         | Tmem23        | 1.6         | Mmd           | 1.5         |
| Cbr2          | 1.6         | Mmrn2         | 1.6         | Olfml3        | 1.5         |
| Bat2          | 1.6         | Bc063749      | 1.6         | Akap8l        | 1.5         |
| Timp2         | 1.6         | Mcl1          | 1.6         | Hoxd4         | 1.5         |
| Sort1         | 1.6         | Bc057552      | 1.6         | Pygo2         | 1.5         |
| Ccnd1         | 1.6         | Large         | 1.6         | Mfap2         | 1.5         |
| Smpd13b       | 1.6         | Rassf5        | 1.6         | 8430408g22rik | 1.5         |

| Gene Symbol   | Fold-Change | Gene Symbol   | Fold-Change | Gene Symbol   | Fold-Change |
|---------------|-------------|---------------|-------------|---------------|-------------|
| Vamp2         | 1.5         | Slco2a1       | -1.5        | Fads2         | -1.5        |
| Cox4i2        | 1.5         | Gpr177        | -1.5        | Aadacl1       | -1.5        |
| Ahdc1         | 1.5         | Syap1         | -1.5        | Strap         | -1.5        |
| Ptk7          | 1.5         | Dock1         | -1.5        | Gm2a          | -1.5        |
| Arid2         | 1.5         | Mto1          | -1.5        | Rheb          | -1.5        |
| Ptplad2       | 1.5         | Tmem174       | -1.5        | 1810049h13rik | -1.5        |
| Tubb2b        | 1.5         | Commd1        | -1.5        | Loc100047261  | -1.5        |
| Fpr2          | 1.5         | 1110031b06rik | -1.5        | Tnfrsf21      | -1.5        |
| Socs3         | 1.5         | Ppp1ca        | -1.5        | Surf1         | -1.5        |
| Hmha1         | 1.5         | Ppapdc1       | -1.5        | Ppm1g         | -1.5        |
| Zfhx3         | 1.5         | Tpk1          | -1.5        | Eg434858      | -1.5        |
| Cdc42ep5      | 1.5         | Acox2         | -1.5        | Glb1l2        | -1.5        |
| Tcf4          | 1.5         | Spg21         | -1.5        | Hspe1         | -1.5        |
| Atox1         | 1.5         | Cul3          | -1.5        | 4930403o06rik | -1.5        |
| Vat1          | 1.5         | Pycrl         | -1.5        | Mgst1         | -1.5        |
| Cpne2         | 1.5         | Atpif1        | -1.5        | Dnajb9        | -1.5        |
| Mmp23         | 1.5         | Nrbf2         | -1.5        | Snx6          | -1.5        |
| Dpt           | 1.5         | Pdss1         | -1.5        | Ttc8          | -1.5        |
| Tkt           | 1.5         | Mcat          | -1.5        | Pdcl          | -1.5        |
| Fxyd5         | 1.5         | 2410022l05rik | -1.5        | Med21         | -1.5        |
| Scamp5        | 1.5         | Fcgr2b        | -1.5        | Rpl31         | -1.5        |
| Atp6v0a1      | 1.5         | Creld2        | -1.5        | Slc6a20b      | -1.5        |
| Ednrb         | 1.5         | Eif4g2        | -1.5        | Fgf9          | -1.5        |
| S100a6        | 1.5         | Hax1          | -1.5        | Adfp          | -1.5        |
| Hexa          | 1.5         | Rps27a        | -1.5        | Slc41a2       | -1.5        |
| 2300002d11rik | 1.5         | D10bwg1364e   | -1.5        | Fga           | -1.5        |
| Zfp259        | 1.5         | Acad10        | -1.5        | Slc9a8        | -1.5        |
| Smtn          | 1.5         | 1500032l24rik | -1.5        | Gng10         | -1.5        |
| Aip           | 1.5         | Sdf2          | -1.5        | 5730469m10rik | -1.5        |
| Stx12         | 1.5         | Loc100048331  | -1.5        | Loc677528     | -1.5        |
| Spink8        | 1.5         | Ctsf          | -1.5        | Tmem159       | -1.5        |
| Loc100047619  | 1.5         | Xdh           | -1.5        | Dcun1d4       | -1.5        |
| Tubb6         | 1.5         | 2810439f02rik | -1.5        | Mboat5        | -1.5        |
| Bmpr1b        | 1.5         | Letm1         | -1.5        | Dnajb12       | -1.5        |
| Nfatc4        | 1.5         | Slc5a9        | -1.5        | Rab38         | -1.5        |
| Loc641240     | 1.5         | Ak2           | -1.5        | Rpl36al       | -1.5        |
| Brd2          | 1.5         | Zc3h14        | -1.5        | Cyp27a1       | -1.5        |
| Slc4a2        | 1.5         | E030010a14rik | -1.5        | lyd           | -1.5        |
| Capn5         | 1.5         | Caml          | -1.5        | Tm2d3         | -1.5        |
| Rab31         | 1.5         | Hpn           | -1.5        | Atp5s         | -1.5        |
| Rgma          | 1.5         | Cd55          | -1.5        | Sat2          | -1.5        |
| Atpbd1b       | 1.5         | Zfp207        | -1.5        | Uqcrc2        | -1.6        |
| Gfod2         | 1.5         | Ccnc          | -1.5        | Mrpl30        | -1.6        |
| Efna5         | 1.5         | Sod1          | -1.5        | Nsdhl         | -1.6        |
| Krt7          | 1.5         | Errfi1        | -1.5        | Nqo1          | -1.6        |
| Flywch2       | 1.5         | Aqp7          | -1.5        | Med10         | -1.6        |
| Cdh1          | 1.5         | Akr1c14       | -1.5        | Epdr1         | -1.6        |

| Gene Symbol   | Fold-Change | Gene Symbol   | Fold-Change | Gene Symbol   | Fold-Change |
|---------------|-------------|---------------|-------------|---------------|-------------|
| Ubr1          | -1.6        | Exoc4         | -1.6        | Dusp28        | -1.6        |
| Chchd4        | -1.6        | Cpn1          | -1.6        | Loc668492     | -1.6        |
| Ndufa9        | -1.6        | Tmem5         | -1.6        | 1110038d17rik | -1.6        |
| Ogfrl1        | -1.6        | Susd3         | -1.6        | Metap1        | -1.6        |
| Eno1          | -1.6        | Msrb2         | -1.6        | Mettl9        | -1.6        |
| Rnaset2b      | -1.6        | Psm12         | -1.6        | Tmem9b        | -1.6        |
| Arf5          | -1.6        | Insig2        | -1.6        | Ubl5          | -1.6        |
| Suclg1        | -1.6        | Gstt2         | -1.6        | Stx18         | -1.6        |
| Wdr55         | -1.6        | Dnajc15       | -1.6        | Rcan1         | -1.6        |
| Loc667370     | -1.6        | Nsbp1         | -1.6        | Arl3          | -1.6        |
| Sri           | -1.6        | Cobll1        | -1.6        | Capns1        | -1.6        |
| Tceal8        | -1.6        | Prosc         | -1.6        | Mrps16        | -1.6        |
| 4933434e20rik | -1.6        | Rala          | -1.6        | Akr1c12       | -1.6        |
| Fundc1        | -1.6        | Bxdc2         | -1.6        | Tmem77        | -1.6        |
| Cldn1         | -1.6        | Eif2b1        | -1.6        | Ranbp9        | -1.6        |
| Pfkip         | -1.6        | P2rx4         | -1.6        | Zfyve20       | -1.6        |
| Net1          | -1.6        | Htatip2       | -1.6        | Ddx1          | -1.6        |
| L7rn6         | -1.6        | Maea          | -1.6        | Agps          | -1.6        |
| Decr2         | -1.6        | Kctd12        | -1.6        | Calm2         | -1.6        |
| Arpc1a        | -1.6        | Iars2         | -1.6        | Anpep         | -1.6        |
| Tmem85        | -1.6        | Sypl2         | -1.6        | Serpina1f     | -1.6        |
| Pdzd11        | -1.6        | Vps29         | -1.6        | Gchfr         | -1.6        |
| Ostf1         | -1.6        | Snrpd1        | -1.6        | Ccdc47        | -1.6        |
| Fmo4          | -1.6        | Bc048355      | -1.6        | Ostm1         | -1.6        |
| Pcmt1         | -1.6        | Napsa         | -1.6        | 2010316f05rik | -1.7        |
| Hist1h4h      | -1.6        | Htra1         | -1.6        | Thoc4         | -1.7        |
| Dynll2        | -1.6        | Rab1b         | -1.6        | Ndufa4        | -1.7        |
| Dpy30         | -1.6        | 2810008m24rik | -1.6        | Nxt2          | -1.7        |
| 5033414d02rik | -1.6        | Atp5d         | -1.6        | Nbr1          | -1.7        |
| Dab2          | -1.6        | Nsmaf         | -1.6        | 1300018j18rik | -1.7        |
| Als2cr2       | -1.6        | Hagh          | -1.6        | Top1          | -1.7        |
| Rps12         | -1.6        | Cyp4f14       | -1.6        | Agpat2        | -1.7        |
| Steap2        | -1.6        | Pitpnc1       | -1.6        | Rnf11         | -1.7        |
| Slc25a33      | -1.6        | Efr3a         | -1.6        | Echs1         | -1.7        |
| Slc35a1       | -1.6        | 1700034h14rik | -1.6        | Tspo          | -1.7        |
| Tmem131       | -1.6        | Tbca          | -1.6        | Entpd5        | -1.7        |
| Hpd           | -1.6        | Gtpbp4        | -1.6        | Arl6ip5       | -1.7        |
| Papss2        | -1.6        | Ppp2cb        | -1.6        | Afmid         | -1.7        |
| Tomm7         | -1.6        | Acn9          | -1.6        | Loc100046457  | -1.7        |
| Yif1a         | -1.6        | 4931417g12rik | -1.6        | Rabggtb       | -1.7        |
| Cyb5r4        | -1.6        | Gjb2          | -1.6        | Atp5j         | -1.7        |
| Mrps31        | -1.6        | Fbxo9         | -1.6        | Nat2          | -1.7        |
| Actn4         | -1.6        | Slc34a3       | -1.6        | Hsd17b2       | -1.7        |
| Rab17         | -1.6        | Bc026682      | -1.6        | Hdhd2         | -1.7        |
| Sypl          | -1.6        | Hmox2         | -1.6        | Pcbd1         | -1.7        |
| Atp6v0e       | -1.6        | A030007117rik | -1.6        | 2510010f15rik | -1.7        |
| Mrpl40        | -1.6        | Loc100047012  | -1.6        | Fkbp2         | -1.7        |

| Gene Symbol   | Fold-Change | Gene Symbol   | Fold-Change | Gene Symbol   | Fold-Change |
|---------------|-------------|---------------|-------------|---------------|-------------|
| Sec61b        | -1.7        | Qdpr          | -1.7        | 0610012d14rik | -1.8        |
| Tmem106a      | -1.7        | Lpar3         | -1.7        | Rps16         | -1.8        |
| Car3          | -1.7        | Car12         | -1.7        | Eg632778      | -1.8        |
| 1810022c23rik | -1.7        | Ncoa4         | -1.7        | Tfam          | -1.8        |
| Galnt1        | -1.7        | Gnas          | -1.7        | Sqstm1        | -1.8        |
| Synj2bp       | -1.7        | Trappc4       | -1.7        | Proc          | -1.8        |
| Bc040758      | -1.7        | Ufsp2         | -1.7        | Bud31         | -1.8        |
| Lrrc8         | -1.7        | 1500031102rik | -1.7        | Socs2         | -1.8        |
| Col4a5        | -1.7        | Cideb         | -1.7        | Echdc2        | -1.8        |
| Rpl27         | -1.7        | Gm1821        | -1.7        | Eg622339      | -1.8        |
| Dtymk         | -1.7        | Tmem166       | -1.7        | Ndufa12       | -1.8        |
| 1110019n10rik | -1.7        | Ppp1cb        | -1.7        | Kl            | -1.8        |
| Ndufc1        | -1.7        | Mcts1         | -1.7        | Plscr1        | -1.8        |
| Mlstd2        | -1.7        | Mpst          | -1.7        | Pgam1         | -1.8        |
| Psen1         | -1.7        | Clptm1        | -1.7        | Fh1           | -1.8        |
| Ly6c1         | -1.7        | Gcdh          | -1.7        | Rnf4          | -1.8        |
| 2410129h14rik | -1.7        | Tmem116       | -1.7        | Loc100048480  | -1.8        |
| 2310045a20rik | -1.7        | Mdh1          | -1.7        | Atp6v1g1      | -1.8        |
| Hmgn2         | -1.7        | Klk1b5        | -1.7        | Ddx52         | -1.8        |
| Fbxo3         | -1.7        | Rbbp7         | -1.7        | Coasy         | -1.8        |
| Mrpl22        | -1.7        | Slc22a18      | -1.7        | Cox15         | -1.8        |
| Zfp313        | -1.7        | Crym          | -1.7        | Jtb           | -1.8        |
| Cnih          | -1.7        | Ppp2r1a       | -1.8        | Tmem9         | -1.8        |
| Dcxr          | -1.7        | Mrpl4         | -1.8        | Rab18         | -1.8        |
| Klhl9         | -1.7        | Asl           | -1.8        | Usp16         | -1.8        |
| Acss2         | -1.7        | Suclg2        | -1.8        | Capn7         | -1.8        |
| Leprel1       | -1.7        | Xylb          | -1.8        | Ntan1         | -1.8        |
| 4631427c17rik | -1.7        | Nhsl1         | -1.8        | Rps27l        | -1.8        |
| Pcx           | -1.7        | Hnrpf         | -1.8        | Mertk         | -1.8        |
| Fads3         | -1.7        | Sdhb          | -1.8        | Ube2k         | -1.8        |
| Mrpl9         | -1.7        | Loc654426     | -1.8        | Rps13         | -1.8        |
| Ndrl          | -1.7        | Cyba          | -1.8        | Gde1          | -1.8        |
| Hpgd          | -1.7        | Zfp810        | -1.8        | Nfs1          | -1.8        |
| Dnajc6        | -1.7        | Hnrph1        | -1.8        | Rpl9          | -1.8        |
| Gstp1         | -1.7        | Tmed10        | -1.8        | Thnsl2        | -1.8        |
| Ubb           | -1.7        | Pcdh24        | -1.8        | Ufc1          | -1.8        |
| Btf3          | -1.7        | G6pc          | -1.8        | 2310005n03rik | -1.8        |
| Jak2          | -1.7        | Tmem41a       | -1.8        | Ap2a2         | -1.8        |
| Ube2e3        | -1.7        | Mrps22        | -1.8        | Bc051227      | -1.8        |
| Pvalb         | -1.7        | Plscr2        | -1.8        | Ccdc91        | -1.8        |
| Tfg           | -1.7        | Ces3          | -1.8        | 2610204l23rik | -1.8        |
| Pcca          | -1.7        | Sumo2         | -1.8        | Nap1l1        | -1.8        |
| Mpv17l        | -1.7        | Gss           | -1.8        | Acad8         | -1.8        |
| Uchl3         | -1.7        | D10ertd322e   | -1.8        | Bc038156      | -1.9        |
| Acsm5         | -1.7        | Pdia3         | -1.8        | Agt           | -1.9        |
| Tnfaip8       | -1.7        | Eef1e1        | -1.8        | Efhd1         | -1.9        |
| Serpina1d     | -1.7        | Rars2         | -1.8        | Paqr9         | -1.9        |

| Gene Symbol    | Fold-Change | Gene Symbol   | Fold-Change | Gene Symbol   | Fold-Change |
|----------------|-------------|---------------|-------------|---------------|-------------|
| Acsl1          | -1.9        | Dpep1         | -1.9        | Sumo3         | -2.0        |
| Cndp1          | -1.9        | Slc22a2       | -1.9        | Hsd17b11      | -2.0        |
| Il13ra1        | -1.9        | Hist1h2bm     | -1.9        | Slc2a2        | -2.0        |
| Sqle           | -1.9        | Cox7a2l       | -1.9        | Akr1a4        | -2.0        |
| Sod3           | -1.9        | Loc100043257  | -1.9        | Cbs           | -2.0        |
| Wwp1           | -1.9        | Myo5a         | -1.9        | Loc100046650  | -2.0        |
| Scoc           | -1.9        | Msn           | -1.9        | Abcc2         | -2.0        |
| Sult1d1        | -1.9        | Rps4x         | -1.9        | Tcp1          | -2.0        |
| Adss           | -1.9        | Car4          | -1.9        | Dio1          | -2.1        |
| Slc39a11       | -1.9        | Nus1          | -1.9        | Slc26a4       | -2.1        |
| Cmb1           | -1.9        | Pepd          | -1.9        | Syng2         | -2.1        |
| Acaa2          | -1.9        | Arl5a         | -1.9        | Slc25a5       | -2.1        |
| Hspd1          | -1.9        | Gpr137b       | -1.9        | Tfrc          | -2.1        |
| Mrpl18         | -1.9        | Slc6a13       | -1.9        | Hip2          | -2.1        |
| Tmco3          | -1.9        | Pdzd3         | -2.0        | Ctsh          | -2.1        |
| Atp5l          | -1.9        | Ndufb6        | -2.0        | Tsc22d1       | -2.1        |
| Nudt19         | -1.9        | Hnrnpa2b1     | -2.0        | Gatad1        | -2.1        |
| Galm           | -1.9        | Timm8b        | -2.0        | Rab5a         | -2.1        |
| Eif5a          | -1.9        | Ccbl2         | -2.0        | Cth           | -2.1        |
| Gna11          | -1.9        | Tmem126a      | -2.0        | Rps2          | -2.1        |
| Slc13a3        | -1.9        | Car14         | -2.0        | Aldh11l       | -2.1        |
| Tst            | -1.9        | Pbld          | -2.0        | Bpnt1         | -2.1        |
| Gsto1          | -1.9        | 2810410p22rik | -2.0        | Slc46a3       | -2.1        |
| Scl0003251.1_2 | -1.9        | Eif3eip       | -2.0        | Zfp330        | -2.1        |
| 1              | -1.9        | Zmynd10       | -2.0        | Mme           | -2.1        |
| Znrf2          | -1.9        | Rdh14         | -2.0        | Jam4          | -2.1        |
| Grpel1         | -1.9        | Bola3         | -2.0        | L2hgdh        | -2.1        |
| Slc35a3        | -1.9        | Mapk14        | -2.0        | Tmem59        | -2.1        |
| Il1rl1l        | -1.9        | Aqp11         | -2.0        | Frrs1         | -2.1        |
| Pex7           | -1.9        | Lonp2         | -2.0        | 5730437n04rik | -2.1        |
| Ppt1           | -1.9        | A530050d06rik | -2.0        | Slc7a9        | -2.1        |
| Mrpl3          | -1.9        | Gfm1          | -2.0        | 1810063b05rik | -2.1        |
| As3mt          | -1.9        | Ndufa6        | -2.0        | Vil1          | -2.1        |
| Pdia4          | -1.9        | 0610010d20rik | -2.0        | Ebp           | -2.1        |
| Nit2           | -1.9        | Rpl24         | -2.0        | Agxt2         | -2.1        |
| Nudt4          | -1.9        | 4833421e05rik | -2.0        | Dgat2         | -2.1        |
| Morf4l1        | -1.9        | Arsb          | -2.0        | Apom          | -2.1        |
| Eif3s8         | -1.9        | Adh5          | -2.0        | Sar1b         | -2.1        |
| 9630015d15rik  | -1.9        | Dhrs1         | -2.0        | Loc667609     | -2.1        |
| Ceacam2        | -1.9        | Capn2         | -2.0        | Sult1c2       | -2.1        |
| Nox4           | -1.9        | Acadm         | -2.0        | Cyp2j11       | -2.1        |
| Sap30          | -1.9        | Slc13a2       | -2.0        | Gsta2         | -2.1        |
| Cml1           | -1.9        | Snx7          | -2.0        | Kdelr2        | -2.1        |
| Atp5o          | -1.9        | Loc100047353  | -2.0        | Higd1c        | -2.1        |
| Adhfe1         | -1.9        | Tmem139       | -2.0        | Hist1h2bj     | -2.1        |
| Commd3         | -1.9        | H47           | -2.0        | Bc026585      | -2.1        |
| Psmb7          | -1.9        | Cyc1          | -2.0        | Cyp2d26       | -2.1        |

| Gene Symbol   | Fold-Change | Gene Symbol   | Fold-Change | Gene Symbol   | Fold-Change |
|---------------|-------------|---------------|-------------|---------------|-------------|
| 2310008m10rik | -2.1        | Gnmt          | -2.3        | Ndufs2        | -2.6        |
| Nola3         | -2.1        | D630023f18rik | -2.3        | Pxmp2         | -2.6        |
| Dpp4          | -2.2        | Loc100045617  | -2.3        | Slc19a1       | -2.6        |
| Mtap7         | -2.2        | Ldhd          | -2.3        | Ai747699      | -2.6        |
| Ahcy1         | -2.2        | Pdk3          | -2.3        | Gstm5         | -2.6        |
| Nt5e          | -2.2        | Tinag         | -2.3        | Ppcs          | -2.6        |
| Spcs1         | -2.2        | Eef2          | -2.3        | Folr1         | -2.6        |
| Etfa          | -2.2        | Defb29        | -2.3        | Clrn3         | -2.6        |
| Loc100045567  | -2.2        | Vdac3         | -2.4        | Hist1h2bf     | -2.6        |
| Sepp1         | -2.2        | Abhd3         | -2.4        | Bc026439      | -2.6        |
| Bc055107      | -2.2        | Acot3         | -2.4        | Cldn2         | -2.6        |
| Bc016495      | -2.2        | Loc381629     | -2.4        | Lrrk2         | -2.6        |
| Acad9         | -2.2        | Upb1          | -2.4        | Loc100047046  | -2.7        |
| 1110008f13rik | -2.2        | Cryz          | -2.4        | D630042f21rik | -2.7        |
| Slc25a15      | -2.2        | Loc268782     | -2.4        | Csad          | -2.7        |
| Pcbp2         | -2.2        | Tspan3        | -2.4        | Etfhdh        | -2.7        |
| Nudt12        | -2.2        | Bc006662      | -2.4        | Mrpl53        | -2.7        |
| Ubie          | -2.2        | Bhmt2         | -2.4        | Nme2          | -2.7        |
| Ottmusg000000 |             | Tmem33        | -2.4        | Chuk          | -2.7        |
| 05148         | -2.2        | Galnt11       | -2.4        | Fgf1          | -2.7        |
| Slc5a2        | -2.2        | Ppa2          | -2.4        | Hint1         | -2.7        |
| Slc25a30      | -2.2        | Calr          | -2.4        | Dhrs4         | -2.7        |
| Sfrs5         | -2.2        | Hist1h2bn     | -2.5        | Col4a3        | -2.8        |
| Adi1          | -2.2        | Hao3          | -2.5        | Loc100047937  | -2.8        |
| Loc677144     | -2.2        | Loc100044204  | -2.5        | Mpp1          | -2.8        |
| Ela1          | -2.2        | Calml4        | -2.5        | Sephs2        | -2.8        |
| B230339h12rik | -2.2        | H3f3a         | -2.5        | Coq9          | -2.8        |
| Sigirr        | -2.2        | C1qbp         | -2.5        | Ugt3a2        | -2.8        |
| Supt4h2       | -2.2        | Qprt          | -2.5        | Rps6          | -2.9        |
| Slc12a3       | -2.2        | Mtch2         | -2.5        | Kng2          | -2.9        |
| Khk           | -2.2        | Arl6          | -2.5        | Loc333331     | -2.9        |
| 2010311d03rik | -2.2        | Ai317395      | -2.5        | Gm853         | -2.9        |
| Dars          | -2.3        | Slc7a7        | -2.5        | Prdx3         | -2.9        |
| Bc021608      | -2.3        | Dnajc12       | -2.5        | Fmo1          | -2.9        |
| Smpdl3a       | -2.3        | 2610528j11rik | -2.5        | Nckap1        | -2.9        |
| Bc021785      | -2.3        | Sucnr1        | -2.5        | Ostb          | -2.9        |
| H2afz         | -2.3        | Cct6a         | -2.5        | Glud1         | -2.9        |
| Agtr1a        | -2.3        | Igfbp3        | -2.5        | Oxct1         | -3.0        |
| Ak3l1         | -2.3        | Pah           | -2.5        | Pcbp1         | -3.0        |
| Pdhb          | -2.3        | Loc100048413  | -2.5        | Mep1b         | -3.1        |
| Ndfip1        | -2.3        | Frap1         | -2.5        | Cat           | -3.1        |
| Slc25a36      | -2.3        | Ddc           | -2.5        | Rbpms2        | -3.2        |
| Ndufc2        | -2.3        | Klk1b4        | -2.5        | Slc27a2       | -3.2        |
| Nola2         | -2.3        | Hist1h2bh     | -2.6        | Plekhb2       | -3.2        |
| F13b          | -2.3        | Vps35         | -2.6        | Slc6a19       | -3.2        |
| Rpl7a         | -2.3        | Eps8          | -2.6        | Rgl1          | -3.2        |
| lah1          | -2.3        | Loc433479     | -2.6        | Slc22a9       | -3.2        |



| Gene Symbol   | Fold-Change |
|---------------|-------------|
| Ivns1abp      | -3.2        |
| Slc47a1       | -3.3        |
| 5033411d12rik | -3.3        |
| Ugt3a1        | -3.3        |
| 2500002l14rik | -3.3        |
| Rps7          | -3.4        |
| Klk1b27       | -3.4        |
| Lgmn          | -3.5        |
| Slc17a3       | -3.6        |
| Cyp4a31       | -3.6        |
| Gpx1          | -3.6        |
| Rnaset2       | -3.7        |
| Tcn2          | -3.8        |
| Cml3          | -3.9        |
| Ehhadh        | -3.9        |
| Slc16a4       | -4.0        |
| Idh1          | -4.0        |
| Fbp1          | -4.2        |
| Scp2          | -4.2        |
| Spp2          | -4.3        |
| Slc22a13      | -4.3        |
| Hrsp12        | -4.5        |
| Atp5f1        | -5.0        |
| Miox          | -5.0        |
| Eg433923      | -5.1        |
| Chpt1         | -5.3        |
| Loc100046918  | -5.4        |
| Tmem27        | -5.6        |
| Cyp51         | -5.9        |
| Cyp4b1        | -6.4        |
| Ugt1a10       | -6.5        |
| Hspa8         | -7.6        |
| Dnase1        | -8.7        |

**Supplementary Table 1:** Genes altered by >1.5-fold in kidney (renal medulla) from COX-2<sup>-/-</sup> mice. Heat map scale: +3-fold (green) to red -3-fold (red). Data are from n=8 mice. Statistical significance (q<0.05) determined using linear models for microarray data modified t-test and false discovery rate corrected.

|                                         | <b>ADMA (µM)</b>              | <b>L-NMMA (µM)</b>           | <b>SDMA (µM)</b>           | <b>Creatinine<br/>(fold change)</b> |
|-----------------------------------------|-------------------------------|------------------------------|----------------------------|-------------------------------------|
| <b>Wild-type</b>                        | 0.28 ±<br>0.02                | 0.070 ±<br>0.01              | 0.24 ±<br>0.02             | 1.00 ±<br>0.04                      |
| <b>COX-1<sup>-/-</sup></b>              | 0.86 ±<br>0.26<br>(p=0.16)    | 0.085 ±<br>0.01<br>(p=0.99)  | 0.63 ±<br>0.14<br>(p=0.09) | 0.89 ±<br>0.05<br>(p=0.46)          |
| <b>COX-2<sup>-/-</sup></b>              | 3.36 ±<br>1.16*<br>(p=0.007)  | 0.38 ±<br>0.11*<br>(p=0.02)  | 1.25 ±<br>0.90<br>(p>0.99) | 1.53 ±<br>0.18*<br>(p=0.01)         |
| <b>Wild type normal salt; vehicle</b>   |                               |                              |                            |                                     |
|                                         | 0.41 ±<br>0.044               | 0.27 ±<br>0.079              | N/A                        | N/A                                 |
| <b>Wild type normal salt; parecoxib</b> |                               |                              |                            |                                     |
|                                         | 0.86 ±<br>0.13*<br>(p=0.005)  | 1.19 ±<br>0.26*<br>(p=0.02)  | N/A                        | N/A                                 |
| <b>Wild type high salt; vehicle</b>     |                               |                              |                            |                                     |
|                                         | 0.73 ±<br>0.14                | 0.78 ±<br>0.17               | N/A                        | N/A                                 |
| <b>Wild type high salt; parecoxib</b>   |                               |                              |                            |                                     |
|                                         | 1.12 ±<br>0.10<br>(p=0.18)    | 0.75 ±<br>0.07<br>(p=1.00)   | N/A                        | N/A                                 |
| <b>IP<sup>+/+</sup></b>                 |                               |                              |                            |                                     |
|                                         | 2.93 ±<br>0.12                | 0.30 ±<br>0.04               | 1.74 ±<br>0.18             | 1.0 ±<br>0.04                       |
| <b>IP<sup>-/-</sup></b>                 |                               |                              |                            |                                     |
|                                         | 4.11 ±<br>0.11*<br>(p=0.0002) | 0.11 ±<br>0.02*<br>(p=0.002) | 1.88 ±<br>0.31<br>(p=0.44) | 1.85 ±<br>0.29*<br>(p=0.0006)       |

**Supplementary Table 2:** Effect of gene deletion of COX inhibition on plasma methylarginines. Methylarginines (ADMA, L-NMMA and SDMA) and creatinine in the plasma of wild-type, COX-1<sup>-/-</sup>, COX-2<sup>-/-</sup> (p-values by Kruskal-Wallis with Dunn's post-hoc test) and IP<sup>-/-</sup> mice and wild type mice treated with vehicle or parecoxib fed a normal or a high salt diet (p-values by Mann-Whitney U-test).
